# Supplementary material for: A Turn-on Fluorescence Sensor for Heparin Detection Based on a Release of Taiwan Cobra Cardiotoxin from a DNA Aptamer or Adenosine-Based Molecular Beacon
Source: MDPI journal article supplement (doi:10.3390/molecules23020460), 2018-02-19
Supplement: s1 [file s1]

## Supplementary Figure Legends

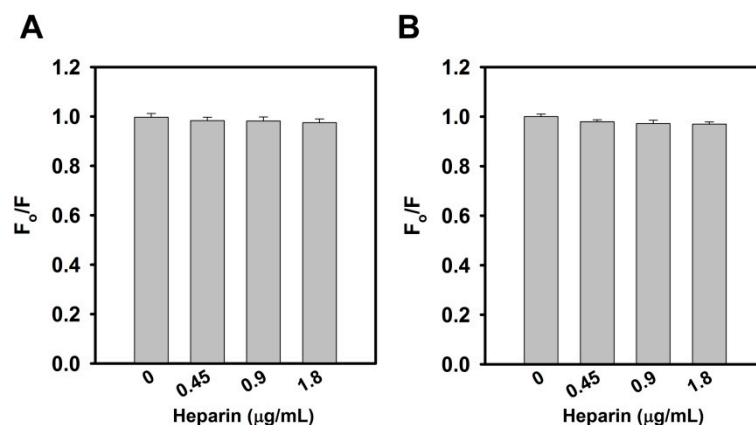

**Figure S1.** The effect of heparin on the FAM fluorescence of 5'-FAM-and-3'-DABCYL-labeled aptamer or MB. The used aptamer and MB concentrations were 20 nM and 10 nM, respectively. Fluorescence intensity (520 nm) of a solution containing (A) aptamer or (B) MB were measured in the presence of indicated heparin concentrations.

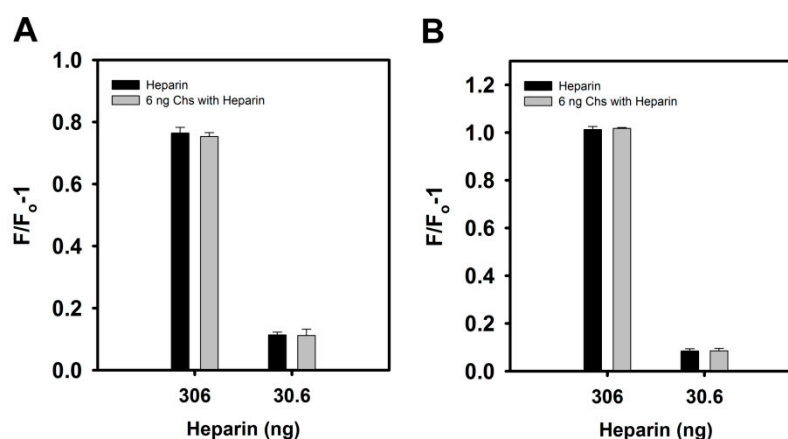

**Figure S2.** Effect of endogenous ChS concentration on the measurement of heparin using CTX3-aptamer or CTX3-MB sensors. The addition of indicated amounts of heparin (in 1  $\mu\text{L}$  of serum) recovered the fluorescence intensity of CTX3-aptamer or CTX3-MB sensors in 2 mL of 10 mM HEPES (pH 8.0) solution. Addition of 6 ng ChS did not further increase the fluorescence recovery of CTX3-aptamer or CTX3-MB sensors caused by the added heparin.
